# Supplementary material for: Raising the Bar for Reproducible Science at the U.S. Environmental Protection Agency Office of Research and Development
Source: PubMed Central journal article supplement — Toxicol Sci. 2015 Mar 19;145(1):16–22. doi: 10.1093/toxsci/kfv020 (PMC4408961; doi:10.1093/toxsci/kfv020), 2015-03-19
Supplement: supp_kfv020_TOXSCI_kfv020_Supplemental_Table_S2.pdf [file supp_kfv020_TOXSCI_kfv020_Supplemental_Table_S2.pdf]

# QUESTIONS FOR OBSERVATIONAL STUDY DESIGN

## COMMUNITY OF PRACTICE FOR STATISTICS

OBSERVATIONAL WORK GROUP: Jon R. Sobus, Leader (NERL), Najwa Haykal-Coates (NHEERL), James L. Crooks (NHEERL), Andrew J. R. Gillespie (NERL), Janet A. Nestlerode (NHEERL), Alan Vette (ACE), Timothy J. Wade (NHEERL)

August 6, 2014

These questions and criteria are focused on study design and best practices to enhance reproducibility of science and have been developed for use in study planning activities. The intended audience includes scientists, branch chiefs, and quality assurance managers for guidance in preparing and reviewing QAPPs and research protocols.

### 1. Study Overview

- a. What is the research problem?
- b. What is (are) the study objective(s)?
- c. What are the research questions that will be answered to address the objective(s)?
- d. What is the population of interest, and how does the study of this population address the research questions?

### 2. Study Design and Data Elements

- a. What type of study is planned (e.g., pilot study, exploratory study, or confirmatory study)?
- b. What is the study design (e.g., cross-sectional, case-control, time-course, prospective)?
- c. Does the study propose the use of existing data?  
*If Yes*
  - i. What is the source of existing data?
  - ii. What was the purpose and scope of the original study?
  - iii. How does the proposed use of the existing data deviate from the purpose and scope of the original study?
  - iv. What is the justification for a new analysis of the existing data?
- d. What is the unit of analysis (i.e., population sample)?
  - i. What is the sampling method (e.g., convenience, random, stratified, cluster)?
  - ii. How will the sampling method be considered in the statistical analysis (e.g., sample weighting)?
  - iii. Can statistical results based on the unit of analysis be extrapolated to the population of interest?
- e. What are the units of observation (i.e., measurement variables)?
  - i. What primary variables (i.e., the key dependent variables and independent variables) are included in this study?
  - ii. What covariates will be examined?
  - iii. What is the variable type (e.g., continuous, categorical) and measurement unit (e.g., milligrams per liter) for each primary variable and covariate?
  - iv. What are the methods for evaluating and transforming data distributions?

### 3. Statistical Analyses

- a. Is a statistical analysis plan included?
- b. What statistical analyses will be performed?
  - i. What statistical parameters will be estimated (e.g., mean, standard deviation, regression coefficient)?
  - ii. What statistical relationships (between measurement variables) will be quantified?

- iii. What [statistical hypotheses](#) will be tested and what [hypothesis tests](#) will be performed?
- iv. What are the assumptions behind the statistical analyses (e.g., normal distribution)?
- v. What software and procedures (e.g., SAS/Proc GLM, R-Chemometrics) will be used?
- vi. How will [statistical models](#) be constructed and evaluated, and what is the method for selecting between competing models?
- vii. How will [uncertainty](#) be quantified and reported?
- viii. How will the results of statistical analyses be interpreted with respect to the research questions?
- ix. How will the results of statistical analyses be presented (i.e., types of equations, tables and figures)?

#### 4. Sample Size

- a. Will a [power analysis](#) be performed?

*If Yes*

- i. How will the power analysis be performed?
- ii. What are the assumptions for the power analysis and why are they necessary?
- iii. What is considered acceptable [power](#) for the study?
- iv. What is the pre-specified [effect size](#) and why was this chosen?
- v. How does the [sample size](#) support the power level and effect size?
- vi. For which variables will repeated measurements be collected?
- vii. How will the number of repeated measures and the correlation among them be taken into account in the power analysis?

*If No*

- i. Why is a power analysis not applicable to the proposed study?

#### 5. Bias

- a. What are the potential sources of bias (e.g., [sampling bias](#), [measurement bias](#))?
  - i. How will bias be identified?
  - ii. What approaches will be used to minimize or eliminate this bias?
- b. What will be done to avoid [reporting bias](#) and [publication bias](#)?

#### 6. Data Inclusion/Exclusion

- a. What are [data inclusion](#) and [data exclusion](#) criteria?
- b. What are the proposed methods for detecting and treating [outliers](#) and spurious values?

#### 7. Data Analysis Considerations

- a. How will [missing data](#) be coded in the data set and treated in statistical analyses?
- b. How will covariates be evaluated as [confounders](#) or [effect modifiers](#)/interactions?
- c. How will values below a [detection limit/quantitation limit](#) be represented?
- d. Are negative measurement data possible (e.g., as a result of background correction if applicable) and how will these data be used?

#### 8. Multiple Comparisons

- a. Will [multiple test correction](#) (i.e., an adjustment for [multiple comparisons](#)) be performed?
  - i. If yes, what method will be used?
  - ii. If no, what is the explanation for not performing a multiple test correction?
- b. Will [subsets](#) of the population sample be extracted for further testing? If yes, which subsets and for what purpose?

#### 9. Data Management and Sharing

- a. How will the data be archived (e.g., laboratory notebooks, digital backups)?
- b. For data stored in digital-only format, what steps will be taken to ensure that the data are accessible using non-proprietary or open-source software?
- c. What database will be used and why?

**Additional Resources (note that material in Wikipedia is not peer-reviewed)**

| <b>Keywords</b>          | <b>Links</b>                                                                                                                                                                                                                                                                                                                                                                                |
|--------------------------|---------------------------------------------------------------------------------------------------------------------------------------------------------------------------------------------------------------------------------------------------------------------------------------------------------------------------------------------------------------------------------------------|
| confirmatory study       | <a href="http://en.wikipedia.org/wiki/Confirmatory_trial">http://en.wikipedia.org/wiki/Confirmatory_trial</a>                                                                                                                                                                                                                                                                               |
| confounders              | <a href="http://en.wikipedia.org/wiki/Confounding">http://en.wikipedia.org/wiki/Confounding</a><br><a href="http://sphweb.bumc.bu.edu/otlt/MPH-Modules/BS/BS704-EP713_Confounding-EM/BS704-EP713_Confounding-EM_print.html">http://sphweb.bumc.bu.edu/otlt/MPH-Modules/BS/BS704-EP713_Confounding-EM/BS704-EP713_Confounding-EM_print.html</a>                                              |
| covariates               | <a href="http://en.wikipedia.org/wiki/Covariate">http://en.wikipedia.org/wiki/Covariate</a>                                                                                                                                                                                                                                                                                                 |
| data inclusion/exclusion | <a href="http://en.wikipedia.org/wiki/Inclusion_and_exclusion_criteria">http://en.wikipedia.org/wiki/Inclusion_and_exclusion_criteria</a>                                                                                                                                                                                                                                                   |
| dependent variables      | <a href="http://en.wikipedia.org/wiki/Dependent_and_independent_variables">http://en.wikipedia.org/wiki/Dependent_and_independent_variables</a>                                                                                                                                                                                                                                             |
| detection limit          | <a href="http://en.wikipedia.org/wiki/Detection_limit">http://en.wikipedia.org/wiki/Detection_limit</a>                                                                                                                                                                                                                                                                                     |
| distributions            | <a href="http://en.wikipedia.org/wiki/Probability_distribution">http://en.wikipedia.org/wiki/Probability_distribution</a><br><a href="http://en.wikipedia.org/wiki/Normal_distribution">http://en.wikipedia.org/wiki/Normal_distribution</a><br><a href="http://en.wikipedia.org/wiki/Log-normal_distribution">http://en.wikipedia.org/wiki/Log-normal_distribution</a>                     |
| effect modifiers         | <a href="http://www.ams.ac.ir/AIM/NEWPUB/12/15/9/0014.pdf">http://www.ams.ac.ir/AIM/NEWPUB/12/15/9/0014.pdf</a>                                                                                                                                                                                                                                                                             |
| effect size              | <a href="http://en.wikipedia.org/wiki/Effect_size">http://en.wikipedia.org/wiki/Effect_size</a>                                                                                                                                                                                                                                                                                             |
| exploratory study        | <a href="http://en.wikipedia.org/wiki/Exploratory_research">http://en.wikipedia.org/wiki/Exploratory_research</a>                                                                                                                                                                                                                                                                           |
| hypothesis tests         | <a href="http://en.wikipedia.org/wiki/Statistical_hypothesis_testing">http://en.wikipedia.org/wiki/Statistical_hypothesis_testing</a>                                                                                                                                                                                                                                                       |
| independent variables    | <a href="http://en.wikipedia.org/wiki/Dependent_and_independent_variables">http://en.wikipedia.org/wiki/Dependent_and_independent_variables</a>                                                                                                                                                                                                                                             |
| measurement bias         | <a href="http://en.wikipedia.org/wiki/Information_bias_(epidemiology)">http://en.wikipedia.org/wiki/Information_bias_(epidemiology)</a><br><a href="http://pubs.rsc.org/en/content/articlepdf/1997/an/a704789d">http://pubs.rsc.org/en/content/articlepdf/1997/an/a704789d</a>                                                                                                              |
| measurement unit         | <a href="http://en.wikipedia.org/wiki/Units_of_measurement">http://en.wikipedia.org/wiki/Units_of_measurement</a>                                                                                                                                                                                                                                                                           |
| missing data             | <a href="http://en.wikipedia.org/wiki/Missing_data">http://en.wikipedia.org/wiki/Missing_data</a><br><a href="http://www.stat.columbia.edu/~gelman/arm/missing.pdf">http://www.stat.columbia.edu/~gelman/arm/missing.pdf</a>                                                                                                                                                                |
| multiple comparisons     | <a href="http://en.wikipedia.org/wiki/Multiple_comparisons_problem">http://en.wikipedia.org/wiki/Multiple_comparisons_problem</a>                                                                                                                                                                                                                                                           |
| multiple test correction | <a href="http://en.wikipedia.org/wiki/Multiple_comparisons_problem">http://en.wikipedia.org/wiki/Multiple_comparisons_problem</a><br><a href="http://udel.edu/~mcdonald/statmultcomp.html">http://udel.edu/~mcdonald/statmultcomp.html</a><br><a href="http://en.wikipedia.org/wiki/False_discovery_rate">http://en.wikipedia.org/wiki/False_discovery_rate</a>                             |
| outliers                 | <a href="http://en.wikipedia.org/wiki/Outlier">http://en.wikipedia.org/wiki/Outlier</a>                                                                                                                                                                                                                                                                                                     |
| pilot study              | <a href="http://en.wikipedia.org/wiki/Pilot_experiment">http://en.wikipedia.org/wiki/Pilot_experiment</a><br><a href="http://www.ncbi.nlm.nih.gov/pmc/articles/PMC3081994/">http://www.ncbi.nlm.nih.gov/pmc/articles/PMC3081994/</a>                                                                                                                                                        |
| population               | <a href="http://en.wikipedia.org/wiki/Statistical_population">http://en.wikipedia.org/wiki/Statistical_population</a>                                                                                                                                                                                                                                                                       |
| power                    | <a href="http://www.ma.utexas.edu/users/mks/statmistakes/power.html">http://www.ma.utexas.edu/users/mks/statmistakes/power.html</a><br><a href="http://udel.edu/~mcdonald/statsampsize.html">http://udel.edu/~mcdonald/statsampsize.html</a><br><a href="http://www.stat.columbia.edu/~gelman/stuff_for_blog/chap20.pdf">http://www.stat.columbia.edu/~gelman/stuff_for_blog/chap20.pdf</a> |

|                           |                                                                                                                                                                                                                                                                                                                                                                                                                                          |
|---------------------------|------------------------------------------------------------------------------------------------------------------------------------------------------------------------------------------------------------------------------------------------------------------------------------------------------------------------------------------------------------------------------------------------------------------------------------------|
| power analysis            | <a href="http://www.ats.ucla.edu/stat/seminars/Intro_power/default.htm">http://www.ats.ucla.edu/stat/seminars/Intro_power/default.htm</a><br><a href="http://www.ats.ucla.edu/stat/gpower/indepsamps.htm">http://www.ats.ucla.edu/stat/gpower/indepsamps.htm</a><br><a href="http://www.gpower.hhu.de/en.html">http://www.gpower.hhu.de/en.html</a><br><a href="http://www.ats.ucla.edu/stat/dae/">http://www.ats.ucla.edu/stat/dae/</a> |
| publication bias          | <a href="http://www.ma.utexas.edu/users/mks/statmistakes/filedrawer.html">http://www.ma.utexas.edu/users/mks/statmistakes/filedrawer.html</a>                                                                                                                                                                                                                                                                                            |
| quantitation limit        | <a href="http://www.ncbi.nlm.nih.gov/pmc/articles/PMC2556583/">http://www.ncbi.nlm.nih.gov/pmc/articles/PMC2556583/</a>                                                                                                                                                                                                                                                                                                                  |
| reporting bias            | <a href="http://en.wikipedia.org/wiki/Reporting_bias">http://en.wikipedia.org/wiki/Reporting_bias</a>                                                                                                                                                                                                                                                                                                                                    |
| sample size               | <a href="http://en.wikipedia.org/wiki/Sample_size">http://en.wikipedia.org/wiki/Sample_size</a><br><a href="http://en.wikipedia.org/wiki/Statistical_power#Software_for_Power_and_Sample_Size_Calculations">http://en.wikipedia.org/wiki/Statistical_power#Software for Power and Sample Size Calculations</a>                                                                                                                           |
| sampling bias             | <a href="http://en.wikipedia.org/wiki/Biased_sample">http://en.wikipedia.org/wiki/Biased_sample</a>                                                                                                                                                                                                                                                                                                                                      |
| sampling method           | <a href="http://en.wikipedia.org/wiki/Sampling_(statistics)">http://en.wikipedia.org/wiki/Sampling_(statistics)</a>                                                                                                                                                                                                                                                                                                                      |
| statistical analyses      | <a href="http://en.wikipedia.org/wiki/Statistics">http://en.wikipedia.org/wiki/Statistics</a>                                                                                                                                                                                                                                                                                                                                            |
| statistical hypotheses    | <a href="http://en.wikipedia.org/wiki/Statistical_hypothesis_testing">http://en.wikipedia.org/wiki/Statistical_hypothesis_testing</a>                                                                                                                                                                                                                                                                                                    |
| statistical models        | <a href="http://en.wikipedia.org/wiki/Statistical_model">http://en.wikipedia.org/wiki/Statistical_model</a>                                                                                                                                                                                                                                                                                                                              |
| statistical parameters    | <a href="http://en.wikipedia.org/wiki/Statistical_parameter">http://en.wikipedia.org/wiki/Statistical_parameter</a>                                                                                                                                                                                                                                                                                                                      |
| statistical relationships | <a href="http://en.wikipedia.org/wiki/Correlation_and_dependence">http://en.wikipedia.org/wiki/Correlation_and_dependence</a>                                                                                                                                                                                                                                                                                                            |
| study design              | <a href="http://en.wikipedia.org/wiki/Study_design">http://en.wikipedia.org/wiki/Study_design</a>                                                                                                                                                                                                                                                                                                                                        |
| subsets                   | <a href="http://en.wikipedia.org/wiki/Statistical_population">http://en.wikipedia.org/wiki/Statistical_population</a>                                                                                                                                                                                                                                                                                                                    |
| uncertainty               | <a href="http://webpages.ursinus.edu/lriley/ref/unc/unc.html">http://webpages.ursinus.edu/lriley/ref/unc/unc.html</a>                                                                                                                                                                                                                                                                                                                    |
| unit of analysis          | <a href="http://en.wikipedia.org/wiki/Unit_of_analysis">http://en.wikipedia.org/wiki/Unit_of_analysis</a>                                                                                                                                                                                                                                                                                                                                |
| unit of observation       | <a href="http://en.wikipedia.org/wiki/Unit_of_observation">http://en.wikipedia.org/wiki/Unit_of_observation</a>                                                                                                                                                                                                                                                                                                                          |
| variable type             | <a href="http://en.wikipedia.org/wiki/Statistical_data_type">http://en.wikipedia.org/wiki/Statistical_data_type</a>                                                                                                                                                                                                                                                                                                                      |
| weighting                 | <a href="http://www.applied-survey-methods.com/weight.html">http://www.applied-survey-methods.com/weight.html</a>                                                                                                                                                                                                                                                                                                                        |
